# Supplementary material for: Photopatterned microswimmers with programmable motion without external stimuli
Source: PubMed Central journal article supplement (PMC8342497; doi:10.1038/s41467-021-24996-8), 2021-08-05
Supplement: 41467_2021_24996_MOESM2_ESM.pdf [file 41467_2021_24996_MOESM2_ESM.pdf]

## **Description of Additional Supplementary Files**

File Name: Supplementary Movie 1

Description: Linear propulsion of the rocket-like swimmer.

File Name: Supplementary Movie 2

Description: Linear propulsion of the rectangular swimmer.

File Name: Supplementary Movie 3

Description: Circular motion of the rectangular swimmer.

File Name: Supplementary Movie 4

Description: Circular motion of the rocket-like swimmer.

File Name: Supplementary Movie 5

Description: Rotary motion of the microswimmer.

File Name: Supplementary Movie 6

Description: A parallel movement of multiple microswimmers with identical shapes.

File Name: Supplementary Movie 7

Description: Time-course motion change of the microswimmer.

File Name: Supplementary Movie 8

Description: Disassembly of the microswimmer after a designated time.

File Name: Supplementary Movie 9

Description: Long-range (1.5m) propulsion of the rocket-like microswimmer

File Name: Supplementary Movie 10

Description: Spiral movement of the microswimmer.

File Name: Supplementary Movie 11

Description: Reverse-spiral movement of the microswimmer.

File Name: Supplementary Movie 12

Description: Disassembly and a change in motion (from circular to linear) of the microswimmer.

File Name: Supplementary Movie 13

Description: Disassembly and a change in motion (from linear to circular) of the microswimmer
